# Supplementary material
Source: publisher site journal article supplement (https://www.dovepress.com/get_supplementary_file.php?f=399085.docx)
Supplement: Supplementary file 1 [file get_supplementary_file.php]

**Supplementary Tables**

**Supplementary Table 1**: Characteristics of 11 929 women by serum liver enzyme collection who had delivered between Aug 2014 and Dec 2017.

|  | **No LFTs collected (n=10 044)** | **LFTs collected (n=1 885)** | ***p–*value** |
| --- | --- | --- | --- |
| **Maternal characteristics** |  |  |  |
| Age (years) | 30 (27 – 33) | 30 (26 – 33) | 0.18 |
| *Race/Ethnicity* |  |  |  |
| Caucasian | 3383 (33.7%) | 794 (42.1%) | **< 0.01** |
| East Asian | 1797 (17.9%) | 285 (15.1%) |
| South Asian | 2945 (29.3%) | 380 (20.2%) |
| Othera | 1919 (19.1%) | 426 (22.6%) |
| Pre–pregnancy BMI (kg/m2) | 24.2 (21.5 – 27.9) | 25.3 (22.0 – 29.8) | **< 0.01** |
| Primiparous | 3347 (33.3%) | 542 (28.8%) | **< 0.01** |
| Parity | 1 (0 – 1) | 1 (0 – 2) | **< 0.01** |
| Smoker | 358 (3.6%) | 116 (6.2%) | **< 0.01** |
| Alcohol intake | 76 (0.8%) | 10 (0.5%) | 0.29 |
| Gestation (weeks) at OGTT | 27.0 (25.5 – 28.0) | 27.0 (26.0 – 28.0) | 0.04 |
| *75g OGTT BGL results* |  |  |  |
| Fasting | 4.4 (4.1 – 4.6) | 4.4 (4.1 – 4.7) | **< 0.01** |
| 1–hour | 7.4 (6.2 – 8.7) | 7.4 (6.2 – 8.9) | 0.52 |
| 2–hour | 6.1 (5.2 – 7.1) | 6.1 (5.2 – 7.2) | 0.60 |
| **Pregnancy outcomes**b |  |  |  |
| Gestation (weeks) at delivery | 39.4 (38.6 – 40.3) | 39.2 (38.3 – 40.1) | **< 0.01** |
| Induction of labor | 2781 (27.7%) | 622 (33.0%) | **< 0.01** |
| Cesarean delivery | 2565 (25.5%) | 585 (31.0%) | **< 0.01** |
| Neonate birthweight centile (%) | 48.4 (25.0 – 73.1) | 48.8 (24.7 – 72.5) | 0.89 |
| *Adverse maternal pregnancy outcomes* |  |  |  |
| GDM | 1702 (16.9%) | 372 (19.7%) | **< 0.01** |
| Gestational hypertension | 480 (4.8%) | 166 (8.8%) | **< 0.01** |
| Pre–eclampsia | 129 (1.3%) | 47 (2.5%) | **< 0.01** |
| Eclampsia | 2 (0.0%) | 10 (0.5%) | **< 0.01** |
| **Composite**c | 2163 (6.0%) | 532 (19.7%) | **< 0.01** |
| *Adverse neonatal pregnancy outcomes* |  |  |  |
| Pre–term birth | 443 (4.4%) | 125 (6.6%) | **< 0.01** |
| SGA | 931 (9.3%) | 173 (9.2%) | 0.90 |
| LGA | 976 (9.7%) | 179 (9.5%) | 0.77 |
| Neonatal hypoglycemia | 259 (2.6%) | 65 (3.4%) | **0.03** |
| Admission to neonatal HDU | 1041 (10.4%) | 252 (13.4%) | **< 0.01** |
| **Composite**d | 2859 (28.5%) | 570 (30.2%) | 0.12 |

Reported as median (interquartile range) or number (percentage). Bold text indicates significance at the *p*<0.05 level. a Other ethnicity includes African, Middle Eastern, Persian, Pacific Islander, Maori, Aboriginal and Torres Strait Islander. b Total n for No LFTs collected group was 10 038 and total n for LFTs collected was 1891. c Composite adverse maternal outcomes include GDM, gestational hypertension, pre–eclampsia and eclampsia. d Composite adverse neonatal outcomes include pre–term birth, SGA, LGA, neonatal hypoglycemia and admission to neonatal HDU. *BMI: body mass index; OGTT: oral glucose tolerance test; BGL: blood glucose level; GDM: gestational diabetes mellitus; SGA: small–for–gestational age; LGA: large–for–gestational age; HDU: high dependency unit.*

**Supplementary Table 2**: Characteristics of 478 women by HSI status who had liver enzymes collected pre–gravid and delivered from Aug 2014 to Dec 2017.

|  | **Non-Elevated HSI (≤ 36) (n=144)** | **Elevated HSI (> 36) (n=334)** | ***p–*value** |
| --- | --- | --- | --- |
| **Maternal characteristics** |  |  |  |
| Age (years) | 30 (26 – 33) | 31 (26 – 34) | 0.13 |
| *Race/Ethnicity* |  |  |  |
| Caucasian | 69 (47.9%) | 158 (47.3%) | 0.23 |
| East Asian | 19 (13.2%) | 28 (8.4%) |
| South Asian | 30 (20.8%) | 66 (19.8%) |
| Othera | 26 (18.1%) | 82 (24.6%) |
| Pre–pregnancy BMI (kg/m2) | 21.3 (19.8 - 23.3) | 28.5 (25.4 - 32.5) | **< 0.01** |
| Primiparous | 44 (30.6%) | 60 (18.0%) | **< 0.01** |
| Smoker | 8 (5.6%) | 25 (7.5%) | 0.45 |
| Alcohol intake | 1 (0.7%) | 0 (0.0%) | 0.13 |
| *Prior history of GDM (pGDM)* |  |  |  |
| Primiparous | 44 (30.6%) | 60 (18.0%) | **< 0.01** |
| Multiparous, no pGDM | 96 (66.7%) | 235 (70.4%) |
| Multiparous with pGDM | 4 (2.8%) | 39 (11.7%) |
| Family history of diabetes | 46 (31.9%) | 145 (43.4%) | **0.02** |
| Gestation (weeks) at OGTT | 27.0 (26.0 – 28.0) | 27.0 (26.0 – 28.1) | 0.20 |
| *75g OGTT BGL results* |  |  |  |
| Fasting | 4.3 (4.1 – 4.6) | 4.5 (4.2 – 4.8) | **< 0.01** |
| 1–hour | 7.1 (5.8 – 8.4) | 7.8 (6.5 – 9.3) | **< 0.01** |
| 2–hour | 5.7 (5.0 – 6.9) | 6.2 (5.3 – 7.4) | **0.01** |
| **Pregnancy outcomes** |  |  |  |
| Gestation (weeks) at neonate delivery | 39.4 (38.5 – 40.2) | 39.2 (38.4 – 40.1) | 0.24 |
| Induction of labor | 43 (29.9%) | 112 (33.5%) | 0.43 |
| Cesarean delivery | 29 (20.1%) | 105 (31.4%) | **0.01** |
| Neonate birthweight centile (%) | 49.1 (27.2 – 72.9) | 52.1 (23.9 – 73.3) | 0.95 |
| *Adverse maternal outcomes* |  |  |  |
| GDM | 17 (11.8%) | 89 (26.6%) | **< 0.01** |
| Gestational hypertension | 8 (5.6%) | 27 (8.1%) | 0.33 |
| Pre–eclampsia | 3 (2.1%) | 6 (1.8%) | 1.00 |
| Eclampsia | 2 (1.4%) | 1 (0.3%) | 0.22 |
| **Composite**b | 12 (8.3%) | 34 (10.2%) | 0.53 |
| *Adverse neonatal outcomes* |  |  |  |
| Pre–term birth (<37 weeks) | 5 (3.5%) | 21 (6.3%) | 0.21 |
| SGA | 9 (6.3%) | 28 (8.4%) | 0.42 |
| LGA | 9 (6.3%) | 38 (11.4%) | 0.08 |
| Neonatal hypoglycaemia | 1 (0.7%) | 18 (5.4%) | **0.02** |
| Admission to neonatal HDU | 10 (6.9%) | 45 (13.5%) | **0.04** |
| **Composite**c | 27 (18.8%) | 103 (30.8%) | **0.01** |

Reported as median (interquartile range) or number (percentage). Bold text indicates significance at the *p*<0.05 level. a Other ethnicity includes African, Middle Eastern, Persian, Pacific Islander, Maori, Aboriginal and Torres Strait Islander. b Composite adverse maternal outcomes include GDM, gestational hypertension, pre–eclampsia and eclampsia. c Composite adverse neonatal outcomes include pre–term birth, SGA, LGA, neonatal hypoglycemia and admission to neonatal HDU. *HSI: hepatic steatosis index; n: number; BMI: body mass index; GDM: gestational diabetes mellitus; OGTT: oral glucose tolerance test; BGL: blood glucose level; SGA: small–for–gestational age; LGA: large–for–gestational age; HDU: high dependency unit.*

**Supplementary Table 3**: Characteristics of 1 407 women by HSI status who had liver enzymes collected during pregnancy and delivered from Aug 2014 to Dec 2017.

|  | **Non-Elevated HSI (≤ 36) (n=481)** | **Elevated HSI (> 36) (n=926)** | ***p–*value** |
| --- | --- | --- | --- |
| **Maternal characteristics** |  |  |  |
| Age (years) | 29 (26 – 33) | 30 (26 – 34) | 0.04 |
| *Race/Ethnicity* |  |  |  |
| Caucasian | 164 (34.1%) | 403 (43.5%) | **< 0.01** |
| East Asian | 120 (24.9%) | 118 (12.7%) |
| South Asian | 96 (20.0%) | 188 (20.3%) |
| Othera | 101 (21.0%) | 217 (23.4%) |
| Pre–pregnancy BMI (kg/m2) | 21.1 (19.6 - 22.9) | 27.8 (24.8 - 32.2) | **< 0.01** |
| Primiparous | 159 (33.1%) | 279 (30.1%) | 0.26 |
| Smoker | 28 (5.8%) | 55 (5.9%) | 0.93 |
| Alcohol intake | 6 (1.2%) | 3 (0.3%) | 0.07 |
| *Prior history of GDM (pGDM)* |  |  |  |
| Primiparous | 159 (33.1%) | 280 (30.2%) | 0.55 |
| Multiparous, no pGDM | 297 (61.7%) | 594 (64.1%) |
| Multiparous with pGDM | 25 (5.2%) | 52 (5.6%) |
| Family history of diabetes | 173 (36.0%) | 399 (43.1%) | **0.01** |
| Gestation (weeks) at OGTT | 27.0 (26.0 – 28.0) | 27.1 (26.0 – 28.1) | 0.08 |
| *75g OGTT BGL results* |  |  |  |
| Fasting | 4.3 (4.1 – 4.6) | 4.5 (4.2 – 4.8) | **< 0.01** |
| 1–hour | 6.8 (5.8 – 8.2) | 7.5 (6.4 – 9.1) | **< 0.01** |
| 2–hour | 5.8 (5.0 – 7.0) | 6.3 (5.3 – 7.3) | **< 0.01** |
| **Pregnancy outcomes** |  |  |  |
| Gestation (weeks) at neonate delivery | 39.3 (38.4 – 40.1) | 39.2 (38.2 – 40.1) | **0.03** |
| Induction of labor | 131 (27.2%) | 336 (36.3%) | **< 0.01** |
| Cesarean delivery | 129 (26.8%) | 322 (34.8%) | **< 0.01** |
| Neonate birthweight centile (%) | 52.2 (28.4 – 72.6) | 45.8 (22.3 – 72.3) | **0.03** |
| *Adverse maternal outcomes* |  |  |  |
| GDM | 59 (12.3%) | 207 (22.4%) | **< 0.01** |
| Gestational hypertension | 16 (3.3%) | 115 (12.4%) | **< 0.01** |
| Pre–eclampsia | 6 (1.2%) | 32 (3.5%) | **0.02** |
| Eclampsia | 0 (0.0%) | 7 (0.8%) | 0.10 |
| **Composite**b | 76 (15.8%) | 315 (34.0%) | **< 0.01** |
| *Adverse neonatal outcomes* |  |  |  |
| Pre–term birth (<37 weeks) | 27 (5.6%) | 72 (7.8%) | 0.13 |
| SGA | 37 (7.7%) | 99 (10.7%) | 0.07 |
| LGA | 51 (10.6%) | 81 (8.7%) | 0.26 |
| Neonatal hypoglycaemia | 9 (1.9%) | 37 (4.0%) | **0.03** |
| Admission to neonatal HDU | 55 (11.4%) | 142 (15.3%) | 0.05 |
| **Composite**c | 140 (29.1%) | 298 (32.2%) | 0.24 |

Reported as median (interquartile range) or number (percentage). Bold text indicates significance at the *p*<0.05 level. a Other ethnicity includes African, Middle Eastern, Persian, Pacific Islander, Maori, Aboriginal and Torres Strait Islander. b Composite adverse maternal outcomes include GDM, gestational hypertension, pre–eclampsia and eclampsia. c Composite adverse neonatal outcomes include pre–term birth, SGA, LGA, neonatal hypoglycemia and admission to neonatal HDU. *HSI: hepatic steatosis index; n: number; BMI: body mass index; GDM: gestational diabetes mellitus; OGTT: oral glucose tolerance test; BGL: blood glucose level; SGA: small–for–gestational age; LGA: large–for–gestational age; HDU: high dependency unit.*
